# Supplementary figures and images for: Lipid peroxidation biomarkers for evaluating oxidative stress in equine neuroaxonal dystrophy
Source: PubMed Central journal article supplement — J Vet Intern Med. 2018 Aug 22;32(5):1740–7. doi: 10.1111/jvim.15241 (PMC6189351; doi:10.1111/jvim.15241), 2018-08-22

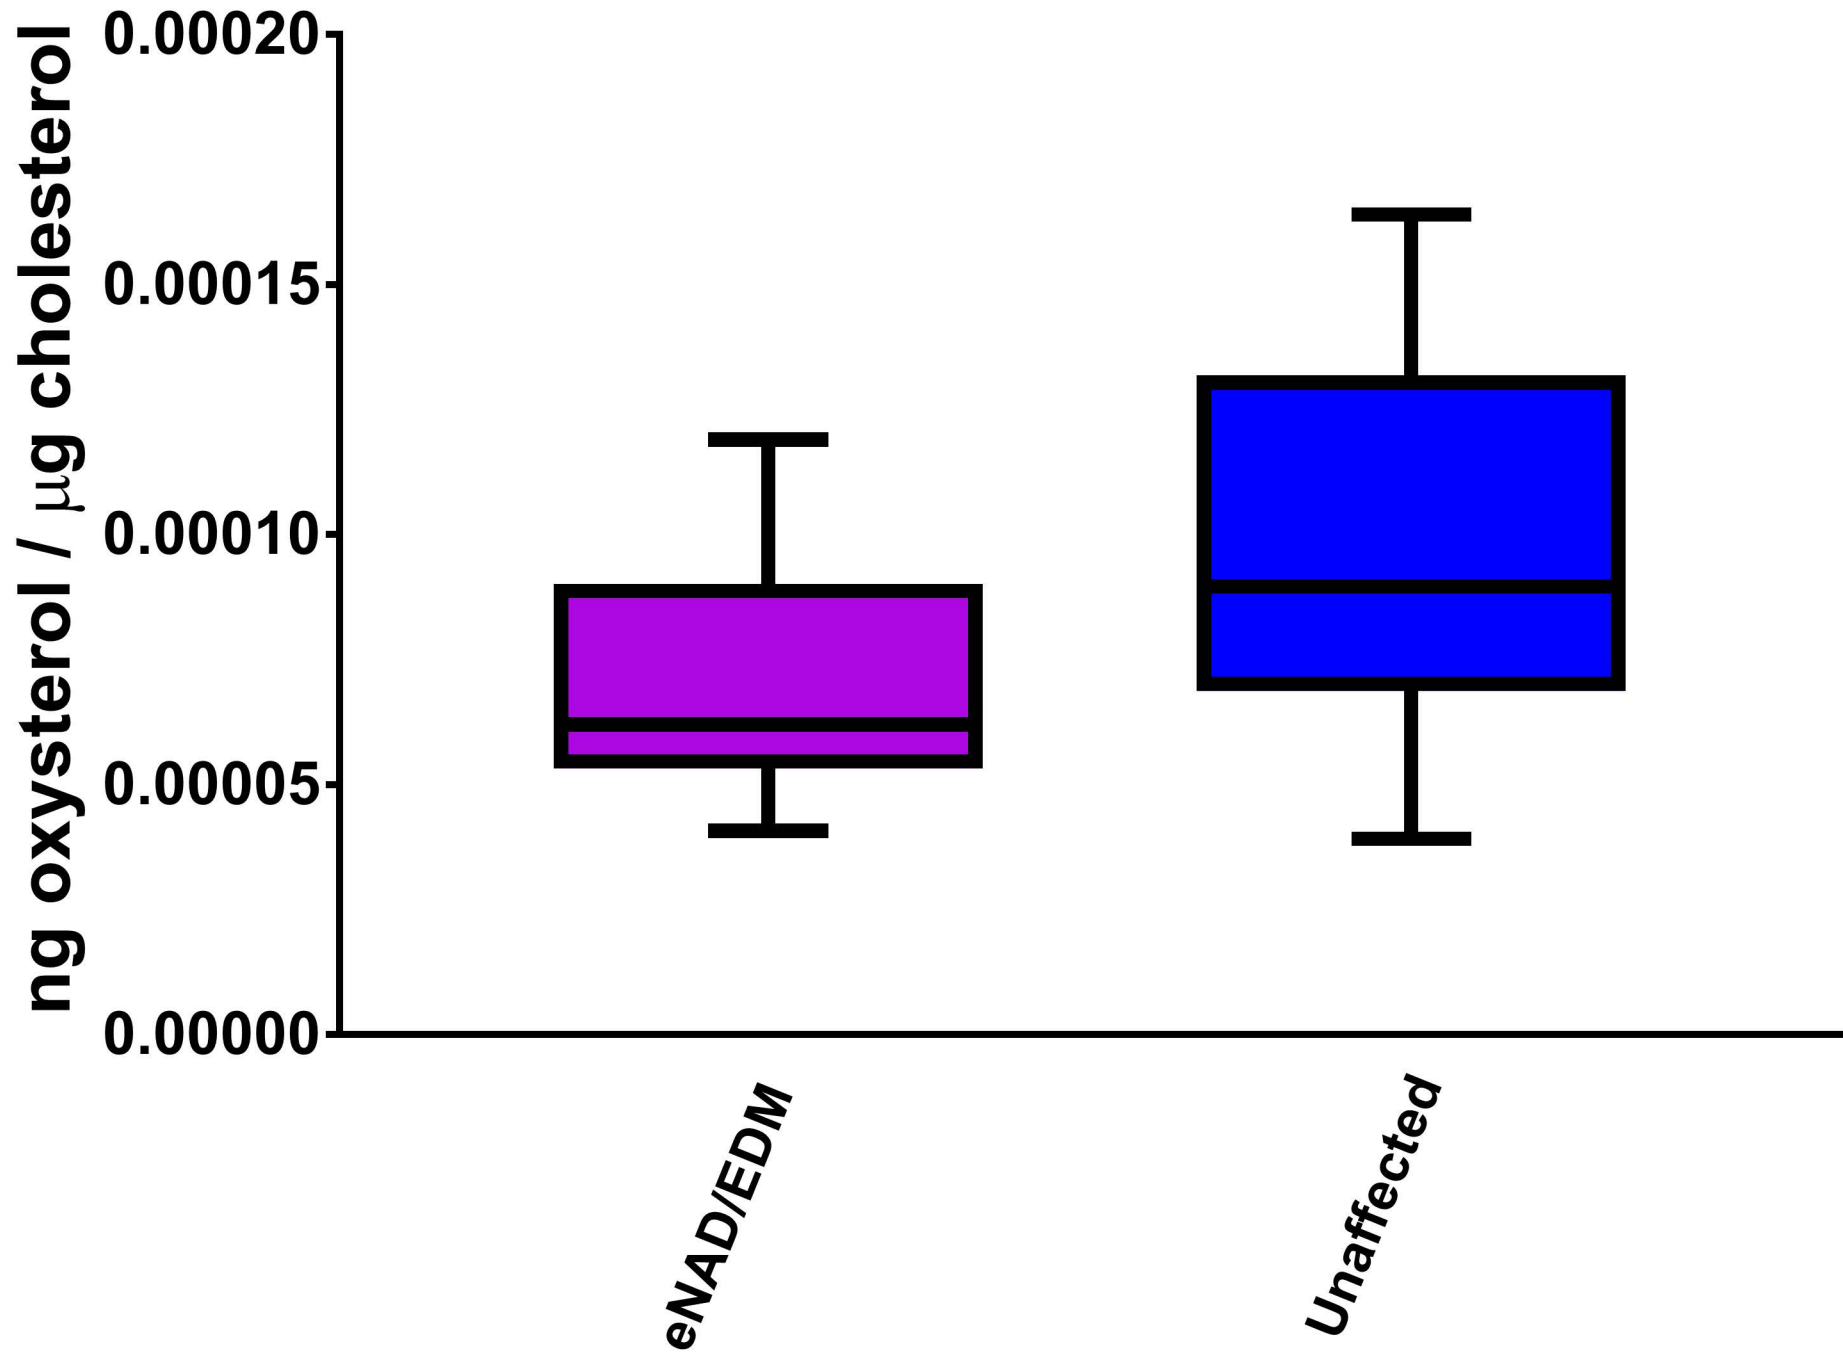

Supplement: JVIM-32-1740-s001.pdf [file JVIM-32-1740-s001.pdf]
